# Supplementary material for: Nanoparticles as scaffolds for FRET-based ratiometric detection of mercury ions in water with QDs as donors
Source: Royal Society of Chemistry journal article supplement (doi:10.1039/c2an35434a), 2012-01-01
Supplement: c2an35434a.pdf [file c2an35434a.pdf]

## Electronic Supplementary Information

### Nanoparticles as scaffolds for FRET-based Ratiometric Detection of Mercury Ions in Water with QDs as Donors

Baoyu Liu,<sup>a</sup> Fang Zeng,<sup>\*a</sup> Guangfei Wu,<sup>a</sup> Shuizhu Wu<sup>\*,a,b</sup>

<sup>a</sup> College of Materials Science & Engineering, South China University of Technology, Guangzhou 510640 (China)

<sup>b</sup> State Key Laboratory of Luminescent Materials & Devices, South China University of Technology, Guangzhou 510640 (China)

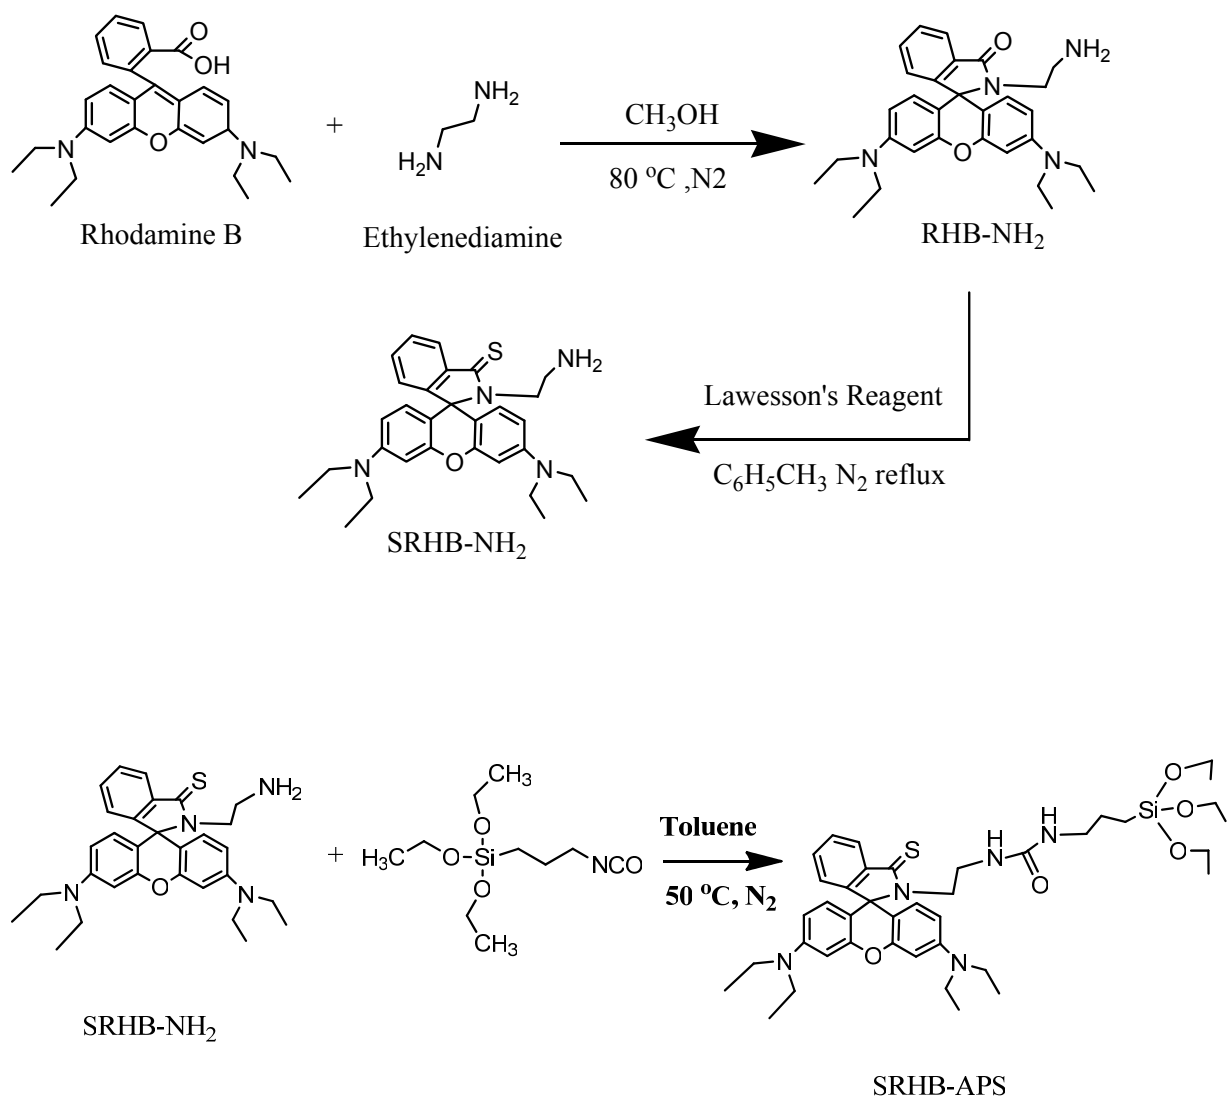

**Scheme S1.** Synthetic route of the  $\text{Hg}^{2+}$  probe (SRhB- $\text{NH}_2$ ) and ethoxysilane-linked probe (probe precursor).

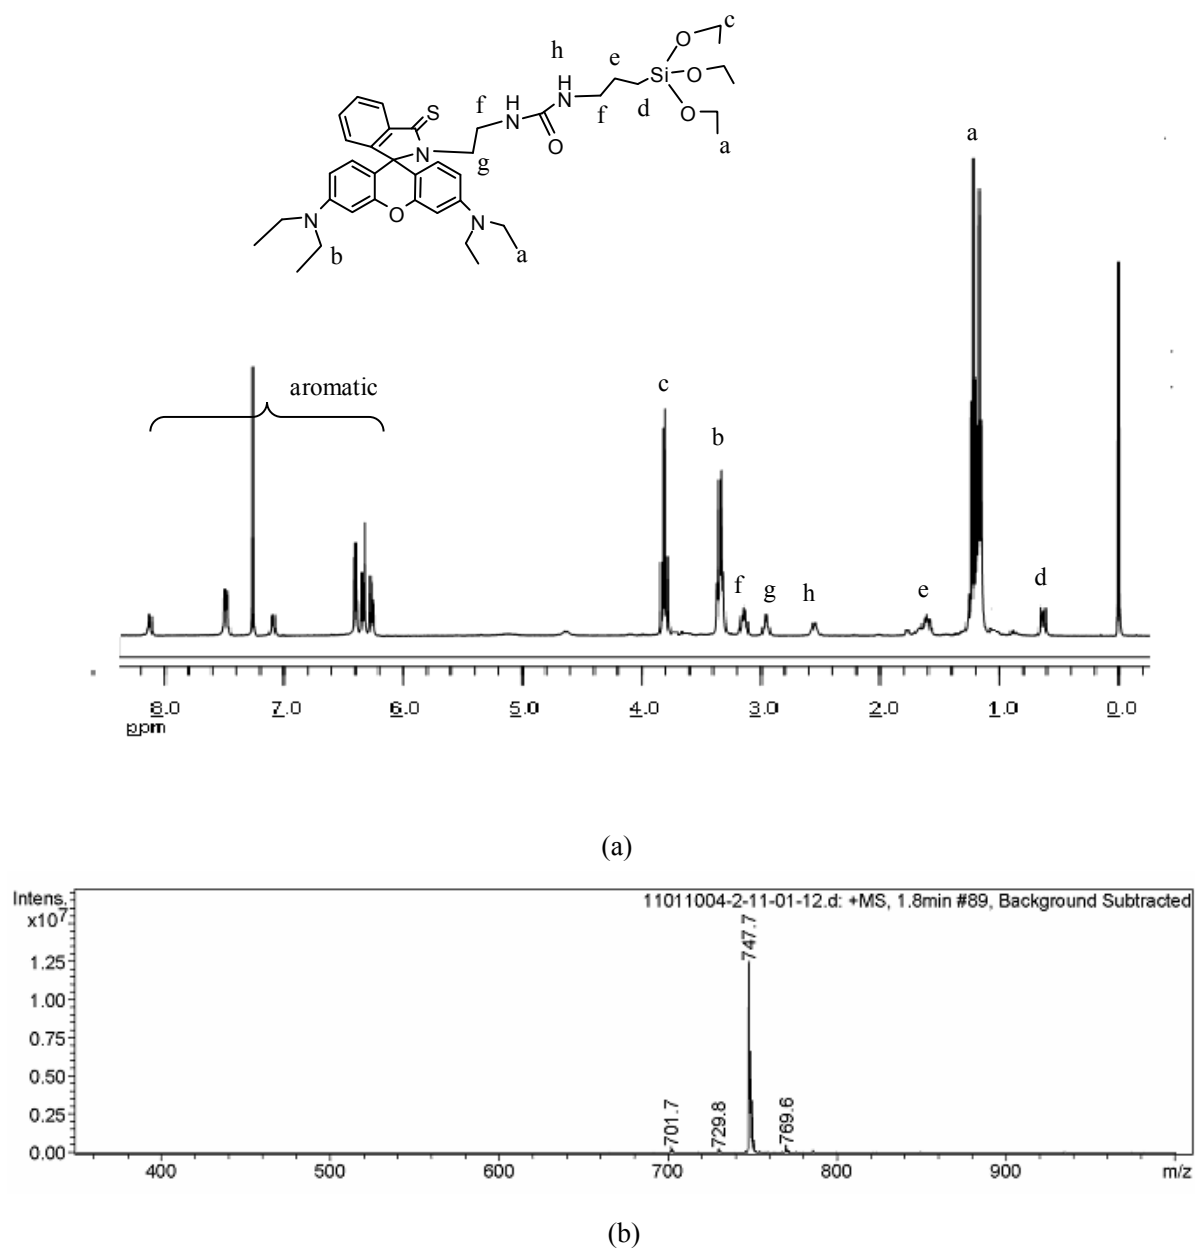

**Fig. S1.** <sup>1</sup>H NMR and MS spectra for probe precursor.

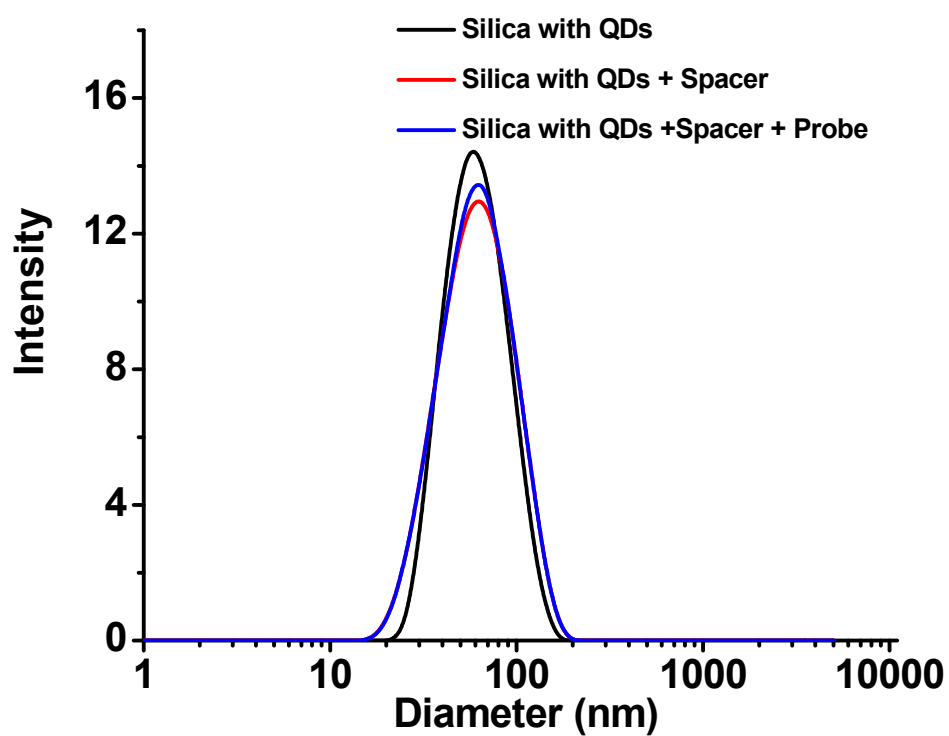

**Fig. S2.** Diameter distribution for QDs/silica composite NPs at different synthesis stages. From the distribution curves, the averaged diameters for the particles were calculated as 58 nm, 61 nm and 61 nm. Coating a probe layer onto the Qds/silica particles could not cause detectable increase in the particle diameter. The thickness of the spacer layer can thus be estimated as 1.5 nm.

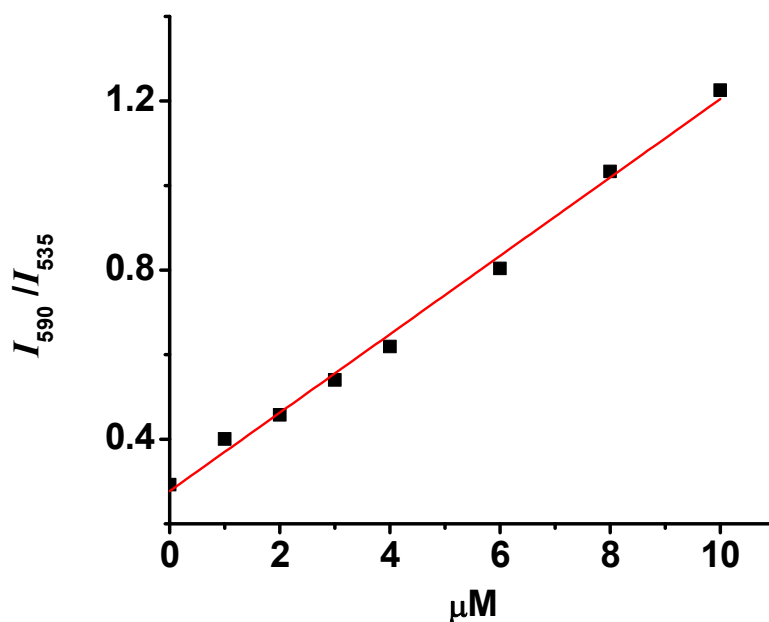

**Fig. S3.** The fluorescence intensity ratio of QDs-based sensor (probe concentration:  $5.6 \times 10^{-5}$  M) as a function of Hg(II) concentration in pH 7.0 HEPES buffered water. Hg(II) concentration: 0 - 10  $\mu$ M. ( $\lambda_{exc}$  = 410 nm).

**The method for determining the detection limit (LOD):**

First the calibration curve was obtained from the plot of fluorescence intensity ratio,  $I_{590}/I_{535}$ , as a function of the analyte concentration ( $Hg^{2+}$ ). The regression curve equation was then obtained.

The detection limit =  $3 \times S.D. / k$

where k is the slope of the curve equation, and S.D. represents the standard deviation for intensity ratio of the sensor dispersion in the absence of mercury ion.

$$I_{590}/I_{535} = 0.28 + 9.3 \text{ E5} [Hg(II)] \quad (R = 0.997)$$

$$LOD = 3 \times 0.082 / 9.3 \text{ E5} = 260 \text{ (nM)}$$

**References:**

- V. Thomsen, D. Schatzlein, D. Mercurio, *Spectroscopy* **2003**, *18*, 112-114.  
A. D. McNaught, A. Wilkinson, *IUPAC Compendium of Chemical Terminology*, **1997**.

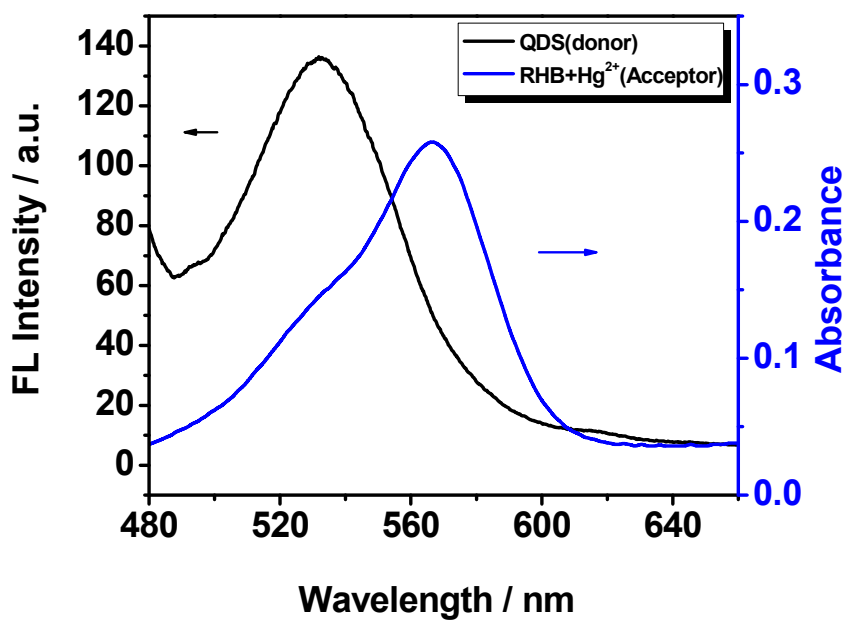

**Fig. S4.** Overlap of QDs' emission band and acceptor's (RhB+Hg<sup>2+</sup>) absorption band for the QDs/silica composite system.

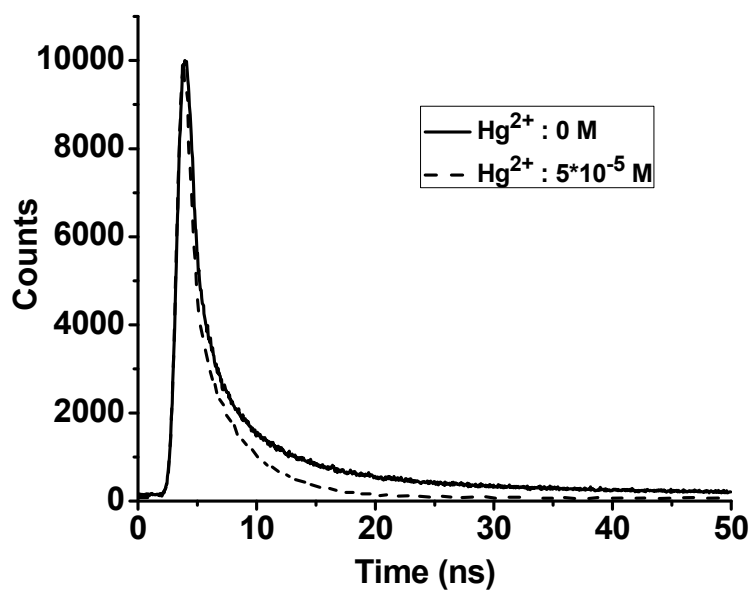

**Fig. S5.** Fluorescence intensity decay curves for CdTe QDs in the composite NPs with or without  $\text{Hg}^{2+}$ .

## Calculation of Förster Critical Radius ( $R_0$ )<sup>1-3</sup>

### Calculation of the Förster radii ( $R_0$ )<sup>1-3</sup>

The Förster's distance or critical distance  $R_0$  is the characteristic distance, at which the efficiency of energy transfer is 50%. The magnitude of  $R_0$  is dependent on the spectral properties of the donor and the acceptor molecules. If the wavelength  $\lambda$  is expressed in nanometers, then  $J(\lambda)$  is in units of  $M^{-1}cm^{-1}nm^4$  and the Förster distance,  $R_0$  in angstroms (Å), is expressed as follows [Eq. (1)]:

$$R_0 = 0.2108 \times [K^2 \times \Phi_D \times n^{-4} \times J(\lambda)]^{1/6} \quad [\text{Eq. (1)}]$$

$K^2$  is the orientation factor for the emission and absorption dipoles and its value depends on their relative orientation,  $n$  is the refractive index of the medium and  $\Phi_D$  is the quantum yield of the donor.  $J(\lambda)$  is the overlap integral of the fluorescence emission spectrum of the donor and the absorption spectrum of the acceptor (Figure S4) [Eq. (2)].

$$J(\lambda) = \int_0^\infty F_D(\lambda) \times \varepsilon_A(\lambda) \times \lambda^4 \times d\lambda \quad [\text{Eq. (2)}]$$

$F_D(\lambda)$  is the fluorescence intensity of the donor in the absence of acceptor normalized so that  $\int_0^\infty F_D(\lambda)d\lambda = 1$ ;  $\varepsilon_A(\lambda)$  is molar extinction coefficient of the acceptor,  $\lambda$  is wavelength. In current experimental conditions, for QD containing dispersion system, the  $J(\lambda)$  was calculated to be  $1.3 \times 10^{14} M^{-1}cm^{-1}nm^4$ . The Förster distance ( $R_0$ ) has been calculated assuming random orientation of the donor and acceptor molecules taking  $K^2 = 2/3$ ,  $n = 1.54$  (silica), and determined  $\Phi_D = 0.20$ .

For QD (donor) and SRhB/Hg<sup>2+</sup> (acceptor) in current experimental situation, by using a commercial software Origin 8.0 as the integral tool, we calculated  $R_0 = 24.0 \text{ \AA}$ . Energy transfer will be effective for  $12.0 \text{ \AA} \leq d \leq 36.0 \text{ \AA}$  ( $R_0 \pm 50\% R_0$ )

### Reference:

(1) Gouanve, F.; Schuster, T.; Allard, E.; Meallet-Renault, R.; Larpent, C. *Adv. Funct. Mater.* **2007**, *17*, 2746-2756.

(2) Lakowicz, J. R. *Principles of Fluorescence Spectroscopy*: Plenum, New York, 1999.

(3) Valeur, B. *Molecular Fluorescence: Principles and Applications*: Wiley-VCH: New York, **2002**.



### Estimation of number of QDs per silica nanoparticle:

The number of QDs per silica particle was estimated according to the following steps:

1. The diameter of CdTe QDs was estimated according to the following empirical fitting function: <sup>1,2</sup>

$$D = (9.8127 \times 10^{-7}) \lambda^3 - (1.7147 \times 10^{-3}) \lambda^2 + (1.0064) \lambda - 194.84 \quad [\text{Eq. (3)}]$$

Where  $D$  (nm) is the diameter of CdTe QDs and  $\lambda$  (nm) is the wavelength of the first absorption peak of the sample (in this study  $\lambda = 514$  nm, for aqueous solution of QDs), and  $D$  was estimated as 2.69 nm.

2. Determination of total number of QDs:

Based on the weight of dried QD, the concentration for the QD solution (the stock solution for preparing QDs/silica NPs) was determined as  $3.22 \times 10^{-2}$  M. During the synthesis of QDs/silica NPs, 0.4 ml of QD stock solution was added into the medium, and the total weight of QDs can be determined as  $3.09 \times 10^{-3}$  g, and total volume of QDs was determined as  $4.5 \times 10^{-4}$  cm<sup>3</sup> (density of CdTe: 6.8 g/cm<sup>3</sup>). Then, total number of QDs was estimated as  $4.41 \times 10^{16}$ .

3. Estimation of number of QDs per silica NP

Upon dialysis and drying, the weight of silica NPs was determined as 0.134 g. The total number of silica NPs was then determined (based on their average diameter of 61 nm) as  $5.13 \times 10^{14}$ . Thus, the average number of QDs per silica NP was finally estimated as 86.

References:

1. W.W. Yu, et al., *Chem. Mater.*, 2003, **15**, 2854-2860.
2. W.W. Yu, et al., *Chem. Mater.*, 2004, **16**, 560-560.
